# Supplementary material
Source: HighWire-hosted journal article supplement (https://bjsm.bmj.com/content/52/19/1241)
Supplement: inline-supplementary-material-1 [file inline-supplementary-material-1.docx]

**Appendix 2.** Search Strategy – MEDLINE database

**MEDLINE (OvidSP)**

**Children and adolescents**

1. exp pediatrics/
2. exp infant/
3. exp child/
4. exp adolescent/
5. (paediatr* or pediatr* or infant* or child* or teenage* or adolescen*).tw.
6. 1 or 2 or 3 or 4 or 5

**Back Pain**

1. dorsalgia.ti,ab.
2. exp Back Pain/
3. backache.ti,ab.
4. exp low back pain/
5. (lumbar adj pain).ti,ab.
6. coccyx.ti,ab.
7. coccydynia.ti,ab.
8. sciatica.ti,ab.
9. lumbago.ti,ab.
10. back disorder$.ti,ab.
11. thoracic pain.mp.
12. lumbosacral pain.mp.
13. 7 or 8 or 9 or 10 or 11 or 12 or 13 or 14 or 15 or 16 or 17 or 18

**Study design**

1. exp controlled clinical trial/ or Randomi* controlled trial.mp.
2. clinical trial/
3. exp prospective study/
4. (random* adj7 (allocat* or allot* or assign* or basis* or divid* or order*)).tw.
5. ((allocat* or allot* or assign* or divid*) adj3 (condition* or experiment* or intervention* or treatment* or therap* or control* or group*)).tw.
6. cohort study.mp.
7. follow up/ or exp longitudinal study/
8. prevalence/ or exp cross-sectional study/ or risk factor/ or cross- sectional study/
9. 20 or 21 or 22 or 23 or 24 or 25 or 26 or 27

**6 and 19 and 28**
